# Supplementary material
Source: PubMed Central journal article supplement (PMC3265060)
Supplement: supp_dev.071308_DEV071308Table_S2.pdf [file supp_dev.071308_DEV071308Table_S2.pdf]

| <b>Coordinates of Amphioxus <i>soxE</i> elements tested for enhancer activity</b> |                   |              |               |
|-----------------------------------------------------------------------------------|-------------------|--------------|---------------|
| <b>Name</b>                                                                       | <b>Chromosome</b> | <b>Start</b> | <b>Finish</b> |
| <i>soxE</i> Region 1                                                              | chrUn             | 28224278     | 28226850      |
| <i>soxE</i> Region 2                                                              | chrUn             | 28214315     | 28216901      |
| <i>soxE</i> Region 3                                                              | chrUn             | 28211629     | 28214269      |
| <i>soxE</i> Region 4                                                              | chrUn             | 28203720     | 28206219      |
| <i>soxE</i> promoter (1.1Kb)                                                      | chrUn             | 28220767     | 28221915      |
| <i>soxE</i> promoter (4.9Kb)                                                      | chrUn             | 28220811     | 28225688      |
| <i>March 2006 (JGI 1.0/braFlo1) assembly</i>                                      |                   |              |               |
