# Supplementary material
Source: PubMed Central journal article supplement (PMC3265060)
Supplement: supp_dev.071308_DEV071308Table_S3.pdf [file supp_dev.071308_DEV071308Table_S3.pdf]

**Summary of *tfap2* homologs expression pattern**

| Species :                      | Amphioxus    | Lamprey      | Lamprey       | Zebrafish     | Zebrafish     | Zebrafish     | Zebrafish     | Zebrafish     |
|--------------------------------|--------------|--------------|---------------|---------------|---------------|---------------|---------------|---------------|
| <i>tfap2</i> paralog :         | <i>tfap2</i> | <i>tfap2</i> | <i>tfap2d</i> | <i>tfap2a</i> | <i>tfap2b</i> | <i>tfap2c</i> | <i>tfap2d</i> | <i>tfap2e</i> |
| <b>Neural ectoderm (brain)</b> | Yes          | Yes          | Yes           | Yes           | Yes           | Yes           | Yes           | Yes           |
| Optic tectum (48 hpf)          | n/a          | ?            | ?             | Yes           | Yes           | No            | Yes           | Yes           |
| Cerebellum (48 hpf)            | n/a          | ?            | ?             | Yes           | Yes           | No            | No            | Yes           |
| Hindbrain (48 hpf)             | n/a          | ?            | ?             | Yes           | Yes           | No            | No            | Yes           |
| Spinal cord                    | n/a          | ?            | ?             | No            | Yes           | No            | No            | No            |
| <b>Ectoderm (epidermis)</b>    | Yes          | Yes          | No            | Yes           | No            | Yes           | No            | Yes           |
| <b>Ectoderm (pharyngeal)</b>   | n/a          | Yes          | No            | Yes           | Yes           | Yes           | No            | No            |
| <b>Neural plate border</b>     | No           | Yes          | No            | Yes           | No            | Yes           | No            | No            |
| <b>Neural crest early</b>      | n/a          | Yes          | No            | Yes           | No            | No            | No            | No            |
| <b>Neural crest late</b>       | n/a          | Yes          | No            | Yes           | Yes           | No            | No            | Yes           |
| <b>Kidney (pronepheros)</b>    | n/a          | n/a          | n/a           | Yes           | Yes           | No            | No            | No            |

“n/a” represents structures that may or may not have homologous regions in indicated species. “?” represents structures where expression pattern is unknown in indicated species.
